# Supplementary material for: Comparison of (K0.5Na0.5)NbO3 Single Crystals Grown by Seed-Free and Seeded Solid-State Single Crystal Growth
Source: MDPI journal article supplement (doi:10.3390/ma16103638), 2023-05-10
Supplement: s1 [file s1]

**Table S1 Crystal data and structure refinement for a 98.5 mol % (K<sub>0.5</sub>Na<sub>0.5</sub>)NbO<sub>3</sub>-1.5 mol % Ba<sub>1.05</sub>Nb<sub>0.77</sub>O<sub>3</sub> single crystal grown on a [001] KTaO<sub>3</sub> seed crystal by sintering at 1135 °C for 20 h (KNBaN).**

|                                                   |                                                              |
|---------------------------------------------------|--------------------------------------------------------------|
| <b>Identification code</b>                        | KNBaN                                                        |
| <b>Empirical formula</b>                          | K <sub>0.5</sub> Na <sub>0.5</sub> NbO <sub>3</sub>          |
| <b>Formula weight</b>                             | 171.96                                                       |
| <b>Temperature/K</b>                              | 296.15                                                       |
| <b>Crystal system</b>                             | monoclinic                                                   |
| <b>Space group</b>                                | P2                                                           |
| <b>a/Å</b>                                        | 3.9761(4)                                                    |
| <b>b/Å</b>                                        | 3.9637(5)                                                    |
| <b>c/Å</b>                                        | 3.9918(4)                                                    |
| <b>α/°</b>                                        | 90                                                           |
| <b>β/°</b>                                        | 90.072(6)                                                    |
| <b>γ/°</b>                                        | 90                                                           |
| <b>Volume/Å<sup>3</sup></b>                       | 62.911(12)                                                   |
| <b>Z</b>                                          | 1                                                            |
| <b>ρ<sub>calc</sub>/cm<sup>3</sup></b>            | 4.539                                                        |
| <b>μ/mm<sup>-1</sup></b>                          | 5.421                                                        |
| <b>F(000)</b>                                     | 80.0                                                         |
| <b>Crystal size/mm<sup>3</sup></b>                | 0.2 × 0.1 × 0.05                                             |
| <b>Radiation</b>                                  | MoKα (λ = 0.71073)                                           |
| <b>2θ range for data collection/°</b>             | 10.214 to 52.862                                             |
| <b>Index ranges</b>                               | -4 ≤ h ≤ 4, -4 ≤ k ≤ 4, -5 ≤ l ≤ 4                           |
| <b>Reflections collected</b>                      | 633                                                          |
| <b>Independent reflections</b>                    | 229 [R <sub>int</sub> = 0.0160, R <sub>sigma</sub> = 0.0146] |
| <b>Data/restraints/parameters</b>                 | 229/1/26                                                     |
| <b>Goodness-of-fit on F<sup>2</sup></b>           | 1.006                                                        |
| <b>Final R indexes [I ≥ 2σ (I)]</b>               | R <sub>1</sub> = 0.0212, wR <sub>2</sub> = 0.0575            |
| <b>Final R indexes [all data]</b>                 | R <sub>1</sub> = 0.0212, wR <sub>2</sub> = 0.0575            |
| <b>Largest diff. peak/hole / e Å<sup>-3</sup></b> | 0.86/-0.83                                                   |
| <b>Flack parameter</b>                            | 0.48(13)                                                     |

**Table S2 Fractional Atomic Coordinates (×10<sup>4</sup>) and Equivalent Isotropic Displacement Parameters (Å<sup>2</sup>×10<sup>3</sup>) for KNBaN. U<sub>eq</sub> is defined as 1/3 of the trace of the orthogonalised U<sub>ij</sub> tensor.**

| <b>Atom</b> | <b>x</b> | <b>y</b>   | <b>z</b> | <b>U(eq)</b> |
|-------------|----------|------------|----------|--------------|
| Nb1         | 0        | 6192.8(2)  | 5000     | 4.6(5)       |
| O1          | 0        | 11380(170) | 5000     | 30(4)        |
| O2          | 5000     | 6400(200)  | 5000     | 29(6)        |
| O3          | 0        | 6360(190)  | 0        | 28(4)        |
| K1          | 5000     | 11450(170) | 0        | 13(6)        |
| Na1         | 5000     | 11450(170) | 0        | 13(6)        |

**Table S3 Anisotropic Displacement Parameters ( $\text{\AA}^2 \times 10^3$ ) for KNBaN. The Anisotropic displacement factor exponent takes the form:  $-2\pi^2[h^2a^{*2}U_{11}+2hka^*b^*U_{12}+\dots]$ .**

| Atom | U <sub>11</sub> | U <sub>22</sub> | U <sub>33</sub> | U <sub>23</sub> | U <sub>13</sub> | U <sub>12</sub> |
|------|-----------------|-----------------|-----------------|-----------------|-----------------|-----------------|
| Nb1  | 4.4(5)          | 7.0(15)         | 2.4(5)          | 0               | -0.2(3)         | 0               |
| O1   | 39(5)           | 4(13)           | 46(6)           | 0               | -14(4)          | 0               |
| O2   | 30(5)           | 10(17)          | 46(6)           | 0               | -10(4)          | 0               |
| O3   | 35(5)           | 16(13)          | 35(5)           | 0               | -10(4)          | 0               |
| K1   | 17.7(15)        | 5(17)           | 16.3(16)        | 0               | -2.1(11)        | 0               |
| Na1  | 17.7(15)        | 5(17)           | 16.3(16)        | 0               | -2.1(11)        | 0               |

**Table S4 Bond Lengths for KNBaN.**

| Atom | Atom             | Length/ $\text{\AA}$ | Atom | Atom              | Length/ $\text{\AA}$ |
|------|------------------|----------------------|------|-------------------|----------------------|
| Nb1  | O1 <sup>1</sup>  | 1.91(7)              | O2   | K1 <sup>5</sup>   | 2.80(10)             |
| Nb1  | O1               | 2.06(7)              | O2   | K1                | 2.82(10)             |
| Nb1  | O2               | 1.990(4)             | O2   | Na1 <sup>3</sup>  | 2.82(10)             |
| Nb1  | O2 <sup>2</sup>  | 1.990(4)             | O2   | Na1 <sup>5</sup>  | 2.80(10)             |
| Nb1  | O3 <sup>3</sup>  | 1.997(3)             | O2   | Na1 <sup>1</sup>  | 2.80(10)             |
| Nb1  | O3               | 1.997(3)             | O3   | Nb1 <sup>10</sup> | 1.997(3)             |
| Nb1  | K1 <sup>4</sup>  | 3.39(4)              | O3   | K1                | 2.83(9)              |
| Nb1  | K1 <sup>5</sup>  | 3.39(4)              | O3   | K1 <sup>2</sup>   | 2.83(9)              |
| Nb1  | Na1 <sup>4</sup> | 3.39(4)              | O3   | K1 <sup>4</sup>   | 2.78(9)              |
| Nb1  | Na1 <sup>6</sup> | 3.39(4)              | O3   | K1 <sup>1</sup>   | 2.78(9)              |
| Nb1  | Na1 <sup>5</sup> | 3.39(4)              | O3   | Na1 <sup>2</sup>  | 2.83(9)              |
| Nb1  | Na1 <sup>1</sup> | 3.39(4)              | O3   | Na1 <sup>4</sup>  | 2.78(9)              |
| O1   | Nb1 <sup>7</sup> | 1.91(7)              | O3   | Na1 <sup>1</sup>  | 2.78(9)              |
| O1   | K1               | 2.8190(14)           | K1   | O1 <sup>11</sup>  | 2.8190(13)           |
| O1   | K1 <sup>8</sup>  | 2.8190(14)           | K1   | O1 <sup>10</sup>  | 2.8154(13)           |
| O1   | K1 <sup>2</sup>  | 2.8154(14)           | K1   | O1 <sup>9</sup>   | 2.8154(13)           |
| O1   | K1 <sup>3</sup>  | 2.8154(14)           | K1   | O2 <sup>10</sup>  | 2.82(10)             |
| O1   | Na1 <sup>2</sup> | 2.8154(14)           | K1   | O2 <sup>7</sup>   | 2.80(10)             |
| O1   | Na1 <sup>8</sup> | 2.8190(14)           | K1   | O2 <sup>12</sup>  | 2.80(10)             |
| O1   | Na1 <sup>3</sup> | 2.8154(14)           | K1   | O3 <sup>13</sup>  | 2.78(9)              |
| O2   | Nb1 <sup>9</sup> | 1.990(4)             | K1   | O3 <sup>7</sup>   | 2.78(9)              |
| O2   | K1 <sup>3</sup>  | 2.82(10)             | K1   | O3 <sup>9</sup>   | 2.83(9)              |
| O2   | K1 <sup>1</sup>  | 2.80(10)             |      |                   |                      |

<sup>1</sup>+X,-1+Y,+Z; <sup>2</sup>-1+X,+Y,+Z; <sup>3</sup>+X,+Y,1+Z; <sup>4</sup>-1+X,-1+Y,+Z; <sup>5</sup>+X,-1+Y,1+Z; <sup>6</sup>-1+X,-1+Y,1+Z; <sup>7</sup>+X,1+Y,+Z; <sup>8</sup>-1+X,+Y,1+Z; <sup>9</sup>1+X,+Y,+Z; <sup>10</sup>+X,+Y,-1+Z; <sup>11</sup>1+X,+Y,-1+Z; <sup>12</sup>+X,1+Y,-1+Z; <sup>13</sup>1+X,1+Y,+Z

Table S5 Bond Angles for KNbBaN.

| Atom            | Atom | Atom             | Angle/°   | Atom              | Atom | Atom              | Angle/°  |
|-----------------|------|------------------|-----------|-------------------|------|-------------------|----------|
| O1 <sup>1</sup> | Nb1  | O1               | 180.00(2) | K1 <sup>1</sup>   | O2   | K1                | 89.59(3) |
| O1 <sup>1</sup> | Nb1  | O2 <sup>2</sup>  | 93(2)     | K1 <sup>1</sup>   | O2   | K1 <sup>3</sup>   | 180(4)   |
| O1 <sup>1</sup> | Nb1  | O2               | 93(2)     | K1 <sup>3</sup>   | O2   | K1                | 90(4)    |
| O1 <sup>1</sup> | Nb1  | O3 <sup>3</sup>  | 92(2)     | K1 <sup>1</sup>   | O2   | K1 <sup>5</sup>   | 91(4)    |
| O1 <sup>1</sup> | Nb1  | O3               | 92(2)     | K1 <sup>5</sup>   | O2   | K1 <sup>3</sup>   | 89.59(3) |
| O1              | Nb1  | K1 <sup>4</sup>  | 123.7(10) | Na1 <sup>5</sup>  | O2   | Na1 <sup>3</sup>  | 89.59(3) |
| O1 <sup>1</sup> | Nb1  | K1 <sup>4</sup>  | 56.3(10)  | Na1 <sup>1</sup>  | O2   | Na1 <sup>5</sup>  | 91(4)    |
| O1              | Nb1  | K1 <sup>5</sup>  | 123.7(10) | Na1 <sup>1</sup>  | O2   | Na1 <sup>3</sup>  | 180(4)   |
| O1 <sup>1</sup> | Nb1  | K1 <sup>5</sup>  | 56.3(10)  | Nb1               | O3   | Nb1 <sup>10</sup> | 176(4)   |
| O1 <sup>1</sup> | Nb1  | Na1 <sup>4</sup> | 56.3(10)  | Nb1 <sup>10</sup> | O3   | K1                | 91.3(15) |
| O1              | Nb1  | Na1 <sup>5</sup> | 123.7(10) | Nb1               | O3   | K1 <sup>2</sup>   | 91.3(15) |
| O1              | Nb1  | Na1 <sup>4</sup> | 123.7(10) | Nb1               | O3   | K1 <sup>4</sup>   | 88.6(16) |
| O1              | Nb1  | Na1 <sup>6</sup> | 123.7(10) | Nb1               | O3   | K1 <sup>1</sup>   | 88.7(16) |
| O1 <sup>1</sup> | Nb1  | Na1 <sup>1</sup> | 56.3(10)  | Nb1 <sup>10</sup> | O3   | K1 <sup>4</sup>   | 88.7(16) |
| O1              | Nb1  | Na1 <sup>1</sup> | 123.7(10) | Nb1 <sup>10</sup> | O3   | K1 <sup>2</sup>   | 91.4(15) |
| O1 <sup>1</sup> | Nb1  | Na1 <sup>5</sup> | 56.3(10)  | Nb1 <sup>10</sup> | O3   | K1 <sup>1</sup>   | 88.6(16) |
| O1 <sup>1</sup> | Nb1  | Na1 <sup>6</sup> | 56.3(10)  | Nb1               | O3   | K1                | 91.4(15) |
| O2              | Nb1  | O1               | 87(2)     | Nb1               | O3   | Na1 <sup>2</sup>  | 91.3(15) |
| O2 <sup>2</sup> | Nb1  | O1               | 87(2)     | Nb1               | O3   | Na1 <sup>1</sup>  | 88.7(16) |
| O2              | Nb1  | O2 <sup>2</sup>  | 175(5)    | Nb1 <sup>10</sup> | O3   | Na1 <sup>2</sup>  | 91.4(15) |
| O2              | Nb1  | O3               | 89.84(14) | Nb1               | O3   | Na1 <sup>4</sup>  | 88.6(16) |
| O2 <sup>2</sup> | Nb1  | O3 <sup>3</sup>  | 89.84(15) | Nb1 <sup>10</sup> | O3   | Na1 <sup>4</sup>  | 88.7(16) |
| O2              | Nb1  | O3 <sup>3</sup>  | 89.98(14) | Nb1 <sup>10</sup> | O3   | Na1 <sup>1</sup>  | 88.6(16) |
| O2 <sup>2</sup> | Nb1  | O3               | 89.98(15) | K1 <sup>4</sup>   | O3   | K1 <sup>2</sup>   | 89.81(6) |
| O2 <sup>2</sup> | Nb1  | K1 <sup>5</sup>  | 127.6(13) | K1 <sup>4</sup>   | O3   | K1 <sup>1</sup>   | 91(4)    |
| O2              | Nb1  | K1 <sup>4</sup>  | 127.6(13) | K1 <sup>1</sup>   | O3   | K1 <sup>2</sup>   | 179(4)   |
| O2              | Nb1  | K1 <sup>5</sup>  | 56(2)     | K1 <sup>2</sup>   | O3   | K1                | 89(4)    |
| O2 <sup>2</sup> | Nb1  | K1 <sup>4</sup>  | 56(2)     | K1 <sup>1</sup>   | O3   | K1                | 89.81(6) |
| O2 <sup>2</sup> | Nb1  | Na1 <sup>1</sup> | 127.7(13) | K1 <sup>4</sup>   | O3   | K1                | 179(4)   |
| O2              | Nb1  | Na1 <sup>1</sup> | 56(2)     | Na1 <sup>1</sup>  | O3   | Na1 <sup>2</sup>  | 179(4)   |
| O2 <sup>2</sup> | Nb1  | Na1 <sup>5</sup> | 127.6(13) | Na1 <sup>4</sup>  | O3   | Na1 <sup>2</sup>  | 89.81(6) |
| O2              | Nb1  | Na1 <sup>6</sup> | 127.7(13) | Na1 <sup>4</sup>  | O3   | Na1 <sup>1</sup>  | 91(4)    |
| O2 <sup>2</sup> | Nb1  | Na1 <sup>4</sup> | 56(2)     | O1 <sup>10</sup>  | K1   | O1                | 90.22(5) |
| O2              | Nb1  | Na1 <sup>5</sup> | 56(2)     | O1 <sup>10</sup>  | K1   | O1 <sup>11</sup>  | 89.77(5) |
| O2              | Nb1  | Na1 <sup>4</sup> | 127.6(13) | O1 <sup>9</sup>   | K1   | O1 <sup>10</sup>  | 179(5)   |
| O2 <sup>2</sup> | Nb1  | Na1 <sup>6</sup> | 56(2)     | O1 <sup>9</sup>   | K1   | O1                | 89.77(5) |
| O3 <sup>3</sup> | Nb1  | O1               | 88(2)     | O1                | K1   | O1 <sup>11</sup>  | 179(5)   |
| O3              | Nb1  | O1               | 88(2)     | O1 <sup>9</sup>   | K1   | O1 <sup>11</sup>  | 90.22(6) |
| O3              | Nb1  | O3 <sup>3</sup>  | 176(4)    | O1 <sup>9</sup>   | K1   | O2 <sup>10</sup>  | 120(3)   |
| O3 <sup>3</sup> | Nb1  | K1 <sup>5</sup>  | 55.3(18)  | O1                | K1   | O2 <sup>10</sup>  | 120(3)   |
| O3 <sup>3</sup> | Nb1  | K1 <sup>4</sup>  | 127.4(13) | O1 <sup>9</sup>   | K1   | O2                | 59.5(14) |
| O3              | Nb1  | K1 <sup>5</sup>  | 127.4(13) | O1 <sup>10</sup>  | K1   | O2                | 120(3)   |
| O3              | Nb1  | K1 <sup>4</sup>  | 55.3(18)  | O1 <sup>11</sup>  | K1   | O2 <sup>10</sup>  | 59.5(14) |
| O3 <sup>3</sup> | Nb1  | Na1 <sup>1</sup> | 127.5(13) | O1 <sup>10</sup>  | K1   | O2 <sup>10</sup>  | 59.5(14) |
| O3 <sup>3</sup> | Nb1  | Na1 <sup>6</sup> | 55.2(18)  | O1                | K1   | O2                | 59.5(14) |
| O3 <sup>3</sup> | Nb1  | Na1 <sup>5</sup> | 55.3(18)  | O1 <sup>11</sup>  | K1   | O2                | 120(3)   |
| O3 <sup>3</sup> | Nb1  | Na1 <sup>4</sup> | 127.4(13) | O1 <sup>11</sup>  | K1   | O3                | 119(3)   |

|                  |     |                  |           |                  |    |                  |          |
|------------------|-----|------------------|-----------|------------------|----|------------------|----------|
| O3               | Nb1 | Na1 <sup>4</sup> | 55.3(18)  | O1 <sup>10</sup> | K1 | O3               | 59.9(16) |
| O3               | Nb1 | Na1 <sup>5</sup> | 127.4(13) | O1 <sup>9</sup>  | K1 | O3 <sup>9</sup>  | 59.9(16) |
| O3               | Nb1 | Na1 <sup>1</sup> | 55.2(18)  | O1 <sup>9</sup>  | K1 | O3               | 119(3)   |
| O3               | Nb1 | Na1 <sup>6</sup> | 127.5(13) | O1 <sup>11</sup> | K1 | O3 <sup>9</sup>  | 59.8(16) |
| K1 <sup>4</sup>  | Nb1 | K1 <sup>5</sup>  | 112.5(19) | O1               | K1 | O3               | 59.8(16) |
| Na1 <sup>6</sup> | Nb1 | Na1 <sup>1</sup> | 112.6(19) | O1 <sup>10</sup> | K1 | O3 <sup>9</sup>  | 119(3)   |
| Na1 <sup>4</sup> | Nb1 | Na1 <sup>1</sup> | 71.9(9)   | O1               | K1 | O3 <sup>9</sup>  | 119(3)   |
| Na1 <sup>5</sup> | Nb1 | Na1 <sup>1</sup> | 72.2(9)   | O2 <sup>7</sup>  | K1 | O1 <sup>11</sup> | 121(3)   |
| Na1 <sup>5</sup> | Nb1 | Na1 <sup>6</sup> | 71.9(9)   | O2 <sup>7</sup>  | K1 | O1               | 60.1(14) |
| Na1 <sup>4</sup> | Nb1 | Na1 <sup>5</sup> | 112.5(19) | O2 <sup>12</sup> | K1 | O1 <sup>10</sup> | 60.2(14) |
| Na1 <sup>4</sup> | Nb1 | Na1 <sup>6</sup> | 72.2(10)  | O2 <sup>7</sup>  | K1 | O1 <sup>9</sup>  | 60.2(14) |
| Nb1 <sup>7</sup> | O1  | Nb1              | 180.0     | O2 <sup>12</sup> | K1 | O1               | 121(3)   |
| Nb1              | O1  | K1 <sup>3</sup>  | 91(2)     | O2 <sup>12</sup> | K1 | O1 <sup>9</sup>  | 121(3)   |
| Nb1              | O1  | K1               | 91(2)     | O2 <sup>12</sup> | K1 | O1 <sup>11</sup> | 60.1(14) |
| Nb1              | O1  | K1 <sup>8</sup>  | 91(2)     | O2 <sup>7</sup>  | K1 | O1 <sup>10</sup> | 121(3)   |
| Nb1 <sup>7</sup> | O1  | K1               | 89(2)     | O2 <sup>7</sup>  | K1 | O2 <sup>10</sup> | 180(4)   |
| Nb1 <sup>7</sup> | O1  | K1 <sup>3</sup>  | 89(2)     | O2 <sup>10</sup> | K1 | O2               | 90(4)    |
| Nb1 <sup>7</sup> | O1  | K1 <sup>8</sup>  | 89(2)     | O2 <sup>7</sup>  | K1 | O2               | 89.59(3) |
| Nb1 <sup>7</sup> | O1  | K1 <sup>2</sup>  | 89(2)     | O2 <sup>7</sup>  | K1 | O2 <sup>12</sup> | 91(4)    |
| Nb1              | O1  | K1 <sup>2</sup>  | 91(2)     | O2 <sup>12</sup> | K1 | O2 <sup>10</sup> | 89.59(3) |
| Nb1 <sup>7</sup> | O1  | Na1 <sup>2</sup> | 89(2)     | O2 <sup>12</sup> | K1 | O2               | 180(4)   |
| Nb1 <sup>7</sup> | O1  | Na1 <sup>3</sup> | 89(2)     | O2               | K1 | O3               | 60(2)    |
| Nb1              | O1  | Na1 <sup>2</sup> | 91(2)     | O2 <sup>10</sup> | K1 | O3               | 60(2)    |
| Nb1              | O1  | Na1 <sup>8</sup> | 91(2)     | O2 <sup>12</sup> | K1 | O3 <sup>9</sup>  | 120.0(9) |
| Nb1              | O1  | Na1 <sup>3</sup> | 91(2)     | O2 <sup>12</sup> | K1 | O3               | 120.0(9) |
| Nb1 <sup>7</sup> | O1  | Na1 <sup>8</sup> | 89(2)     | O2               | K1 | O3 <sup>9</sup>  | 60(2)    |
| K1 <sup>3</sup>  | O1  | K1 <sup>2</sup>  | 179(5)    | O2 <sup>7</sup>  | K1 | O3               | 120.0(9) |
| K1 <sup>8</sup>  | O1  | K1               | 179(5)    | O2 <sup>10</sup> | K1 | O3 <sup>9</sup>  | 60(2)    |
| K1 <sup>2</sup>  | O1  | K1               | 89.77(5)  | O2 <sup>7</sup>  | K1 | O3 <sup>9</sup>  | 120.0(9) |
| K1 <sup>3</sup>  | O1  | K1 <sup>8</sup>  | 89.77(5)  | O3 <sup>7</sup>  | K1 | O1               | 60.1(16) |
| K1 <sup>2</sup>  | O1  | K1 <sup>8</sup>  | 90.22(6)  | O3 <sup>13</sup> | K1 | O1 <sup>10</sup> | 121(3)   |
| K1 <sup>3</sup>  | O1  | K1               | 90.22(7)  | O3 <sup>13</sup> | K1 | O1               | 121(3)   |
| Na1 <sup>3</sup> | O1  | Na1 <sup>8</sup> | 89.77(5)  | O3 <sup>13</sup> | K1 | O1 <sup>9</sup>  | 60.2(16) |
| Na1 <sup>2</sup> | O1  | Na1 <sup>8</sup> | 90.22(6)  | O3 <sup>7</sup>  | K1 | O1 <sup>11</sup> | 121(3)   |
| Na1 <sup>3</sup> | O1  | Na1 <sup>2</sup> | 179(5)    | O3 <sup>7</sup>  | K1 | O1 <sup>10</sup> | 60.2(16) |
| Nb1              | O2  | Nb1 <sup>9</sup> | 175(5)    | O3 <sup>13</sup> | K1 | O1 <sup>11</sup> | 60.1(16) |
| Nb1 <sup>9</sup> | O2  | K1 <sup>1</sup>  | 88.2(17)  | O3 <sup>7</sup>  | K1 | O1 <sup>9</sup>  | 121(3)   |
| Nb1              | O2  | K1 <sup>1</sup>  | 88.3(17)  | O3 <sup>7</sup>  | K1 | O2 <sup>12</sup> | 61(2)    |
| Nb1 <sup>9</sup> | O2  | K1 <sup>3</sup>  | 91.9(16)  | O3 <sup>7</sup>  | K1 | O2 <sup>10</sup> | 119.7(9) |
| Nb1              | O2  | K1 <sup>5</sup>  | 88.2(17)  | O3 <sup>7</sup>  | K1 | O2 <sup>7</sup>  | 61(2)    |
| Nb1 <sup>9</sup> | O2  | K1               | 91.8(16)  | O3 <sup>13</sup> | K1 | O2 <sup>10</sup> | 119.6(9) |
| Nb1 <sup>9</sup> | O2  | K1 <sup>5</sup>  | 88.3(17)  | O3 <sup>13</sup> | K1 | O2 <sup>12</sup> | 61(2)    |
| Nb1              | O2  | K1               | 91.9(16)  | O3 <sup>7</sup>  | K1 | O2               | 119.6(9) |
| Nb1              | O2  | K1 <sup>3</sup>  | 91.8(16)  | O3 <sup>13</sup> | K1 | O2               | 119.7(9) |
| Nb1 <sup>9</sup> | O2  | Na1 <sup>1</sup> | 88.2(17)  | O3 <sup>13</sup> | K1 | O2 <sup>7</sup>  | 61(2)    |
| Nb1 <sup>9</sup> | O2  | Na1 <sup>3</sup> | 91.9(16)  | O3 <sup>7</sup>  | K1 | O3 <sup>9</sup>  | 179(4)   |
| Nb1              | O2  | Na1 <sup>3</sup> | 91.8(16)  | O3 <sup>13</sup> | K1 | O3 <sup>9</sup>  | 89.81(6) |
| Nb1              | O2  | Na1 <sup>1</sup> | 88.3(17)  | O3 <sup>13</sup> | K1 | O3               | 179(4)   |
| Nb1 <sup>9</sup> | O2  | Na1 <sup>5</sup> | 88.3(17)  | O3 <sup>13</sup> | K1 | O3 <sup>7</sup>  | 91(4)    |
| Nb1              | O2  | Na1 <sup>5</sup> | 88.2(17)  | O3 <sup>7</sup>  | K1 | O3               | 89.81(6) |

|                                                                                                                                                                                                                                                                                                                                               |    |    |        |                 |    |    |       |
|-----------------------------------------------------------------------------------------------------------------------------------------------------------------------------------------------------------------------------------------------------------------------------------------------------------------------------------------------|----|----|--------|-----------------|----|----|-------|
| K1 <sup>5</sup>                                                                                                                                                                                                                                                                                                                               | O2 | K1 | 180(4) | O3 <sup>9</sup> | K1 | O3 | 89(4) |
| <sup>1</sup> +X,-1+Y,+Z; <sup>2</sup> -1+X,+Y,+Z; <sup>3</sup> +X,+Y,1+Z; <sup>4</sup> -1+X,-1+Y,+Z; <sup>5</sup> +X,-1+Y,1+Z; <sup>6</sup> -1+X,-1+Y,1+Z; <sup>7</sup> +X,1+Y,+Z; <sup>8</sup> -1+X,+Y,1+Z; <sup>9</sup> 1+X,+Y,+Z; <sup>10</sup> +X,+Y,-1+Z; <sup>11</sup> 1+X,+Y,-1+Z; <sup>12</sup> +X,1+Y,-1+Z; <sup>13</sup> 1+X,1+Y,+Z |    |    |        |                 |    |    |       |

Table S6 Atomic Occupancy for KNBaN.

| Atom | Occupancy | Atom | Occupancy |
|------|-----------|------|-----------|
| K1   | 0.5       | Na1  | 0.5       |

Table S7 Crystal data and structure refinement for a 98.5 mol % (K<sub>0.5</sub>Na<sub>0.5</sub>)NbO<sub>3</sub>-1.5 mol % Ba(Cu<sub>0.13</sub>Nb<sub>0.66</sub>)O<sub>3</sub> single crystal grown on a [001] KTaO<sub>3</sub> seed crystal by sintering at 1125°C for 10 h (KNBaCuN).

|                                             |                                                              |
|---------------------------------------------|--------------------------------------------------------------|
| Identification code                         | KNBaCuN                                                      |
| Empirical formula                           | K <sub>0.5</sub> Na <sub>0.5</sub> NbO <sub>3</sub>          |
| Empirical formula                           | K <sub>0.5</sub> Na <sub>0.5</sub> NbO <sub>3</sub>          |
| Formula weight                              | 171.96                                                       |
| Temperature/K                               | 296.15                                                       |
| Crystal system                              | monoclinic                                                   |
| Space group                                 | P2                                                           |
| a/Å                                         | 3.9714(6)                                                    |
| b/Å                                         | 3.9683(5)                                                    |
| c/Å                                         | 3.9996(6)                                                    |
| α/°                                         | 90                                                           |
| β/°                                         | 89.999(9)                                                    |
| γ/°                                         | 90                                                           |
| Volume/Å <sup>3</sup>                       | 63.033(16)                                                   |
| Z                                           | 1                                                            |
| ρ <sub>calc</sub> /cm <sup>3</sup>          | 4.530                                                        |
| μ/mm <sup>-1</sup>                          | 5.411                                                        |
| F(000)                                      | 80.0                                                         |
| Crystal size/mm <sup>3</sup>                | 0.15 × 0.15 × 0.1                                            |
| Radiation                                   | MoKα (λ = 0.71073)                                           |
| 2θ range for data collection/°              | 10.194 to 49.582                                             |
| Index ranges                                | -4 ≤ h ≤ 4, -4 ≤ k ≤ 4, -4 ≤ l ≤ 4                           |
| Reflections collected                       | 705                                                          |
| Independent reflections                     | 234 [R <sub>int</sub> = 0.0247, R <sub>sigma</sub> = 0.0227] |
| Data/restraints/parameters                  | 234/31/26                                                    |
| Goodness-of-fit on F <sup>2</sup>           | 1.028                                                        |
| Final R indexes [I > 2σ (I)]                | R <sub>1</sub> = 0.0248, wR <sub>2</sub> = 0.0685            |
| Final R indexes [all data]                  | R <sub>1</sub> = 0.0248, wR <sub>2</sub> = 0.0685            |
| Largest diff. peak/hole / e Å <sup>-3</sup> | 0.67/-1.38                                                   |

**Table S8 Fractional Atomic Coordinates ( $\times 10^4$ ) and Equivalent Isotropic Displacement Parameters ( $\text{\AA}^2 \times 10^3$ ) for KNBaCuN.  $U_{\text{eq}}$  is defined as 1/3 of the trace of the orthogonalised  $U_{ij}$  tensor.**

| Atom | x    | y          | z    | U(eq)  |
|------|------|------------|------|--------|
| Nb1  | 0    | 8821.9(2)  | 5000 | 4.1(5) |
| O1   | 5000 | 9050(150)  | 5000 | 30(5)  |
| O2   | 0    | 14030(140) | 5000 | 27(5)  |
| O3   | 0    | 9050(150)  | 0    | 29(5)  |
| K1   | 5000 | 14060(110) | 0    | 11(3)  |
| Na1  | 5000 | 14060(110) | 0    | 11(3)  |

**Table S9 Anisotropic Displacement Parameters ( $\text{\AA}^2 \times 10^3$ ) for KNBaCuN. The Anisotropic displacement factor exponent takes the form:  $-2\pi^2[h^2a^{*2}U_{11}+2hka^*b^*U_{12}+...]$ .**

| Atom | $U_{11}$ | $U_{22}$ | $U_{33}$ | $U_{23}$ | $U_{13}$ | $U_{12}$ |
|------|----------|----------|----------|----------|----------|----------|
| Nb1  | 4.0(6)   | 4.7(11)  | 3.5(6)   | 0        | 0.5(4)   | 0        |
| O1   | 31(6)    | 14(13)   | 45(6)    | 0        | 0(5)     | 0        |
| O2   | 32(6)    | 8(12)    | 43(6)    | 0        | -2(5)    | 0        |
| O3   | 29(5)    | 13(13)   | 44(6)    | 0        | 1(5)     | 0        |
| K1   | 15.2(19) | 2(10)    | 16.3(19) | 0        | -0.3(14) | 0        |
| Na1  | 15.2(19) | 2(10)    | 16.3(19) | 0        | -0.3(14) | 0        |

**Table S10 Bond Lengths for KNBaCuN.**

| Atom | Atom             | Length/ $\text{\AA}$ | Atom | Atom              | Length/ $\text{\AA}$ |
|------|------------------|----------------------|------|-------------------|----------------------|
| Nb1  | O1               | 1.988(3)             | O2   | K1 <sup>9</sup>   | 2.8182(6)            |
| Nb1  | O1 <sup>1</sup>  | 1.988(3)             | O2   | K1 <sup>1</sup>   | 2.8182(6)            |
| Nb1  | O2 <sup>2</sup>  | 1.90(6)              | O2   | Na1 <sup>1</sup>  | 2.8182(6)            |
| Nb1  | O2               | 2.07(6)              | O2   | Na1 <sup>9</sup>  | 2.8182(6)            |
| Nb1  | O3 <sup>3</sup>  | 2.002(3)             | O2   | Na1 <sup>3</sup>  | 2.8182(6)            |
| Nb1  | O3               | 2.002(3)             | O3   | Nb1 <sup>10</sup> | 2.002(3)             |
| Nb1  | K1 <sup>4</sup>  | 3.39(2)              | O3   | K1                | 2.81(6)              |
| Nb1  | K1 <sup>2</sup>  | 3.39(2)              | O3   | K1 <sup>1</sup>   | 2.81(6)              |
| Nb1  | K1 <sup>5</sup>  | 3.39(2)              | O3   | K1 <sup>5</sup>   | 2.80(6)              |
| Nb1  | Na1 <sup>2</sup> | 3.39(2)              | O3   | K1 <sup>2</sup>   | 2.80(6)              |
| Nb1  | Na1 <sup>4</sup> | 3.39(2)              | O3   | Na1 <sup>1</sup>  | 2.81(6)              |
| Nb1  | Na1 <sup>5</sup> | 3.39(2)              | O3   | Na1 <sup>2</sup>  | 2.80(6)              |
| O1   | Nb1 <sup>6</sup> | 1.988(3)             | O3   | Na1 <sup>5</sup>  | 2.80(6)              |
| O1   | K1               | 2.82(6)              | K1   | O1 <sup>10</sup>  | 2.82(6)              |
| O1   | K1 <sup>7</sup>  | 2.81(6)              | K1   | O1 <sup>11</sup>  | 2.81(6)              |
| O1   | K1 <sup>3</sup>  | 2.82(6)              | K1   | O1 <sup>8</sup>   | 2.81(6)              |
| O1   | K1 <sup>2</sup>  | 2.81(6)              | K1   | O2 <sup>6</sup>   | 2.8182(6)            |
| O1   | Na1 <sup>2</sup> | 2.81(6)              | K1   | O2 <sup>10</sup>  | 2.8182(6)            |
| O1   | Na1 <sup>7</sup> | 2.81(6)              | K1   | O2 <sup>12</sup>  | 2.8182(6)            |
| O1   | Na1 <sup>3</sup> | 2.82(6)              | K1   | O3 <sup>8</sup>   | 2.80(6)              |
| O2   | Nb1 <sup>8</sup> | 1.90(6)              | K1   | O3 <sup>6</sup>   | 2.81(6)              |
| O2   | K1 <sup>3</sup>  | 2.8182(6)            | K1   | O3 <sup>13</sup>  | 2.80(6)              |
| O2   | K1               | 2.8182(6)            |      |                   |                      |

<sup>1</sup>-1+X,+Y,+Z; <sup>2</sup>+X,-1+Y,+Z; <sup>3</sup>+X,+Y,1+Z; <sup>4</sup>-1+X,-1+Y,1+Z; <sup>5</sup>-1+X,-1+Y,+Z; <sup>6</sup>1+X,+Y,+Z; <sup>7</sup>+X,-1+Y,1+Z; <sup>8</sup>+X,1+Y,+Z; <sup>9</sup>-1+X,+Y,1+Z; <sup>10</sup>+X,+Y,-1+Z; <sup>11</sup>+X,1+Y,-1+Z; <sup>12</sup>1+X,+Y,-1+Z; <sup>13</sup>1+X,1+Y,+Z

**Table S11 Bond Angles for KNBaCuN.**

| Atom            | Atom | Atom             | Angle/°   | Atom              | Atom | Atom              | Angle/°    |
|-----------------|------|------------------|-----------|-------------------|------|-------------------|------------|
| O1              | Nb1  | O1 <sup>1</sup>  | 175(3)    | K1                | O2   | K1 <sup>1</sup>   | 89.594(19) |
| O1 <sup>1</sup> | Nb1  | O2               | 87.4(17)  | K1 <sup>9</sup>   | O2   | K1 <sup>1</sup>   | 90.40(3)   |
| O1              | Nb1  | O2               | 87.4(17)  | K1 <sup>9</sup>   | O2   | K1 <sup>2</sup>   | 89.59(2)   |
| O1              | Nb1  | O3 <sup>2</sup>  | 89.88(12) | K1 <sup>2</sup>   | O2   | K1 <sup>1</sup>   | 180(3)     |
| O1              | Nb1  | O3               | 89.89(12) | Na1 <sup>9</sup>  | O2   | Na1 <sup>2</sup>  | 89.59(2)   |
| O1 <sup>1</sup> | Nb1  | O3               | 89.88(11) | Na1 <sup>9</sup>  | O2   | Na1 <sup>1</sup>  | 90.40(3)   |
| O1 <sup>1</sup> | Nb1  | O3 <sup>2</sup>  | 89.89(12) | Na1 <sup>2</sup>  | O2   | Na1 <sup>1</sup>  | 180(3)     |
| O1 <sup>1</sup> | Nb1  | K1 <sup>3</sup>  | 127.6(10) | Nb1               | O3   | Nb1 <sup>10</sup> | 175(3)     |
| O1              | Nb1  | K1 <sup>4</sup>  | 127.6(10) | Nb1               | O3   | K1                | 91.8(12)   |
| O1 <sup>1</sup> | Nb1  | K1 <sup>4</sup>  | 56.0(14)  | Nb1               | O3   | K1 <sup>4</sup>   | 88.2(12)   |
| O1              | Nb1  | K1 <sup>3</sup>  | 56.0(14)  | Nb1 <sup>10</sup> | O3   | K1                | 91.8(12)   |
| O1              | Nb1  | K1 <sup>5</sup>  | 127.6(10) | Nb1 <sup>10</sup> | O3   | K1 <sup>3</sup>   | 88.2(12)   |
| O1 <sup>1</sup> | Nb1  | K1 <sup>5</sup>  | 56.0(14)  | Nb1               | O3   | K1 <sup>3</sup>   | 88.2(12)   |
| O1 <sup>1</sup> | Nb1  | Na1 <sup>3</sup> | 127.6(10) | Nb1 <sup>10</sup> | O3   | K1 <sup>4</sup>   | 88.2(12)   |
| O1              | Nb1  | Na1 <sup>3</sup> | 56.0(14)  | Nb1 <sup>10</sup> | O3   | K1 <sup>1</sup>   | 91.8(12)   |
| O1 <sup>1</sup> | Nb1  | Na1 <sup>5</sup> | 56.0(14)  | Nb1               | O3   | K1 <sup>1</sup>   | 91.8(12)   |
| O1              | Nb1  | Na1 <sup>5</sup> | 127.6(10) | Nb1               | O3   | Na1 <sup>1</sup>  | 91.8(12)   |
| O1 <sup>1</sup> | Nb1  | Na1 <sup>4</sup> | 56.0(14)  | Nb1 <sup>10</sup> | O3   | Na1 <sup>3</sup>  | 88.2(12)   |
| O1              | Nb1  | Na1 <sup>4</sup> | 127.6(10) | Nb1 <sup>10</sup> | O3   | Na1 <sup>1</sup>  | 91.8(12)   |
| O2 <sup>3</sup> | Nb1  | O1               | 92.6(17)  | Nb1 <sup>10</sup> | O3   | Na1 <sup>4</sup>  | 88.2(12)   |
| O2 <sup>3</sup> | Nb1  | O1 <sup>1</sup>  | 92.6(17)  | Nb1               | O3   | Na1 <sup>4</sup>  | 88.2(12)   |
| O2 <sup>3</sup> | Nb1  | O2               | 180.00(2) | Nb1               | O3   | Na1 <sup>3</sup>  | 88.2(12)   |
| O2 <sup>3</sup> | Nb1  | O3 <sup>2</sup>  | 92.5(17)  | K1 <sup>3</sup>   | O3   | K1 <sup>1</sup>   | 180(3)     |
| O2 <sup>3</sup> | Nb1  | O3               | 92.5(17)  | K1 <sup>4</sup>   | O3   | K1 <sup>3</sup>   | 90(3)      |
| O2 <sup>3</sup> | Nb1  | K1 <sup>3</sup>  | 56.2(6)   | K1 <sup>1</sup>   | O3   | K1                | 90(3)      |
| O2              | Nb1  | K1 <sup>3</sup>  | 123.8(6)  | K1 <sup>3</sup>   | O3   | K1                | 89.955(12) |
| O2 <sup>3</sup> | Nb1  | K1 <sup>5</sup>  | 56.2(6)   | K1 <sup>4</sup>   | O3   | K1                | 180(3)     |
| O2 <sup>3</sup> | Nb1  | K1 <sup>4</sup>  | 56.2(6)   | K1 <sup>4</sup>   | O3   | K1 <sup>1</sup>   | 89.955(13) |
| O2              | Nb1  | K1 <sup>4</sup>  | 123.8(6)  | Na1 <sup>4</sup>  | O3   | Na1 <sup>1</sup>  | 89.955(13) |
| O2              | Nb1  | K1 <sup>5</sup>  | 123.8(6)  | Na1 <sup>4</sup>  | O3   | Na1 <sup>3</sup>  | 90(3)      |
| O2 <sup>3</sup> | Nb1  | Na1 <sup>3</sup> | 56.2(6)   | Na1 <sup>3</sup>  | O3   | Na1 <sup>1</sup>  | 180(3)     |
| O2              | Nb1  | Na1 <sup>3</sup> | 123.8(6)  | O1 <sup>8</sup>   | K1   | O1 <sup>10</sup>  | 180(3)     |
| O2 <sup>3</sup> | Nb1  | Na1 <sup>5</sup> | 56.2(6)   | O1 <sup>10</sup>  | K1   | O1                | 90(3)      |
| O2              | Nb1  | Na1 <sup>5</sup> | 123.8(6)  | O1 <sup>11</sup>  | K1   | O1                | 180(3)     |
| O2 <sup>3</sup> | Nb1  | Na1 <sup>4</sup> | 56.2(6)   | O1 <sup>11</sup>  | K1   | O1 <sup>10</sup>  | 89.550(14) |
| O2              | Nb1  | Na1 <sup>4</sup> | 123.8(6)  | O1 <sup>8</sup>   | K1   | O1 <sup>11</sup>  | 91(3)      |
| O3              | Nb1  | O2               | 87.5(17)  | O1 <sup>8</sup>   | K1   | O1                | 89.550(16) |
| O3 <sup>2</sup> | Nb1  | O2               | 87.5(17)  | O1 <sup>11</sup>  | K1   | O2                | 120.4(19)  |
| O3              | Nb1  | O3 <sup>2</sup>  | 175(3)    | O1 <sup>8</sup>   | K1   | O2 <sup>6</sup>   | 59.9(12)   |
| O3              | Nb1  | K1 <sup>3</sup>  | 55.7(14)  | O1 <sup>8</sup>   | K1   | O2 <sup>10</sup>  | 120.4(19)  |
| O3 <sup>2</sup> | Nb1  | K1 <sup>3</sup>  | 127.8(10) | O1 <sup>8</sup>   | K1   | O2                | 59.9(12)   |
| O3              | Nb1  | K1 <sup>4</sup>  | 55.7(14)  | O1 <sup>11</sup>  | K1   | O2 <sup>6</sup>   | 120.4(18)  |
| O3 <sup>2</sup> | Nb1  | K1 <sup>4</sup>  | 127.8(10) | O1 <sup>8</sup>   | K1   | O2 <sup>12</sup>  | 120.4(19)  |

|                  |     |                  |            |                  |    |                  |           |
|------------------|-----|------------------|------------|------------------|----|------------------|-----------|
| O3 <sup>2</sup>  | Nb1 | K1 <sup>5</sup>  | 55.7(14)   | O1 <sup>11</sup> | K1 | O2 <sup>12</sup> | 59.9(12)  |
| O3               | Nb1 | K1 <sup>5</sup>  | 127.8(10)  | O1 <sup>11</sup> | K1 | O2 <sup>10</sup> | 59.9(12)  |
| O3 <sup>2</sup>  | Nb1 | Na1 <sup>4</sup> | 127.8(10)  | O2 <sup>10</sup> | K1 | O1               | 120.0(19) |
| O3 <sup>2</sup>  | Nb1 | Na1 <sup>3</sup> | 127.8(10)  | O2 <sup>6</sup>  | K1 | O1               | 59.6(12)  |
| O3               | Nb1 | Na1 <sup>5</sup> | 127.8(10)  | O2 <sup>12</sup> | K1 | O1               | 120.0(19) |
| O3               | Nb1 | Na1 <sup>3</sup> | 55.7(14)   | O2 <sup>10</sup> | K1 | O1 <sup>10</sup> | 59.6(12)  |
| O3 <sup>2</sup>  | Nb1 | Na1 <sup>5</sup> | 55.7(14)   | O2 <sup>6</sup>  | K1 | O1 <sup>10</sup> | 120.0(19) |
| O3               | Nb1 | Na1 <sup>4</sup> | 55.7(14)   | O2               | K1 | O1               | 59.6(12)  |
| K1 <sup>5</sup>  | Nb1 | K1 <sup>4</sup>  | 72.2(6)    | O2               | K1 | O1 <sup>10</sup> | 120.0(19) |
| K1 <sup>5</sup>  | Nb1 | K1 <sup>3</sup>  | 112.3(12)  | O2 <sup>12</sup> | K1 | O1 <sup>10</sup> | 59.6(12)  |
| K1 <sup>3</sup>  | Nb1 | K1 <sup>4</sup>  | 71.6(6)    | O2               | K1 | O2 <sup>6</sup>  | 89.59(2)  |
| Na1 <sup>3</sup> | Nb1 | Na1 <sup>4</sup> | 71.6(6)    | O2               | K1 | O2 <sup>10</sup> | 90.40(3)  |
| Na1 <sup>5</sup> | Nb1 | Na1 <sup>4</sup> | 72.2(6)    | O2               | K1 | O2 <sup>12</sup> | 180(3)    |
| Na1 <sup>5</sup> | Nb1 | Na1 <sup>3</sup> | 112.3(12)  | O2 <sup>6</sup>  | K1 | O2 <sup>10</sup> | 180(3)    |
| Nb1              | O1  | Nb1 <sup>6</sup> | 175(3)     | O2 <sup>12</sup> | K1 | O2 <sup>10</sup> | 89.59(2)  |
| Nb1 <sup>6</sup> | O1  | K1 <sup>7</sup>  | 88.2(12)   | O2 <sup>12</sup> | K1 | O2 <sup>6</sup>  | 90.40(2)  |
| Nb1 <sup>6</sup> | O1  | K1 <sup>3</sup>  | 88.2(12)   | O3               | K1 | O1               | 60.1(13)  |
| Nb1 <sup>6</sup> | O1  | K1 <sup>2</sup>  | 91.8(12)   | O3 <sup>13</sup> | K1 | O1 <sup>8</sup>  | 60.2(13)  |
| Nb1              | O1  | K1               | 91.8(12)   | O3 <sup>6</sup>  | K1 | O1               | 60.1(13)  |
| Nb1              | O1  | K1 <sup>7</sup>  | 88.2(12)   | O3 <sup>8</sup>  | K1 | O1 <sup>11</sup> | 60.2(13)  |
| Nb1              | O1  | K1 <sup>3</sup>  | 88.2(12)   | O3               | K1 | O1 <sup>8</sup>  | 119.9(7)  |
| Nb1              | O1  | K1 <sup>2</sup>  | 91.8(12)   | O3 <sup>13</sup> | K1 | O1               | 119.8(7)  |
| Nb1 <sup>6</sup> | O1  | K1               | 91.8(12)   | O3 <sup>13</sup> | K1 | O1 <sup>10</sup> | 119.8(7)  |
| Nb1              | O1  | Na1 <sup>2</sup> | 91.8(12)   | O3 <sup>8</sup>  | K1 | O1 <sup>8</sup>  | 60.2(13)  |
| Nb1              | O1  | Na1 <sup>7</sup> | 88.2(12)   | O3 <sup>8</sup>  | K1 | O1 <sup>10</sup> | 119.8(7)  |
| Nb1 <sup>6</sup> | O1  | Na1 <sup>2</sup> | 91.8(12)   | O3 <sup>13</sup> | K1 | O1 <sup>11</sup> | 60.2(13)  |
| Nb1              | O1  | Na1 <sup>3</sup> | 88.2(12)   | O3 <sup>6</sup>  | K1 | O1 <sup>10</sup> | 60.1(13)  |
| Nb1 <sup>6</sup> | O1  | Na1 <sup>7</sup> | 88.2(12)   | O3 <sup>8</sup>  | K1 | O1               | 119.8(7)  |
| Nb1 <sup>6</sup> | O1  | Na1 <sup>3</sup> | 88.2(12)   | O3               | K1 | O1 <sup>11</sup> | 119.9(7)  |
| K1 <sup>2</sup>  | O1  | K1               | 90(3)      | O3 <sup>6</sup>  | K1 | O1 <sup>8</sup>  | 119.9(7)  |
| K1 <sup>7</sup>  | O1  | K1 <sup>2</sup>  | 89.550(14) | O3 <sup>6</sup>  | K1 | O1 <sup>11</sup> | 119.9(7)  |
| K1 <sup>3</sup>  | O1  | K1 <sup>7</sup>  | 91(3)      | O3               | K1 | O1 <sup>10</sup> | 60.1(13)  |
| K1 <sup>3</sup>  | O1  | K1 <sup>2</sup>  | 180(3)     | O3 <sup>6</sup>  | K1 | O2 <sup>12</sup> | 60.0(12)  |
| K1 <sup>3</sup>  | O1  | K1               | 89.550(12) | O3 <sup>13</sup> | K1 | O2 <sup>6</sup>  | 60.2(12)  |
| K1 <sup>7</sup>  | O1  | K1               | 180(3)     | O3 <sup>6</sup>  | K1 | O2 <sup>10</sup> | 119.7(19) |
| Na1 <sup>7</sup> | O1  | Na1 <sup>2</sup> | 89.550(14) | O3 <sup>6</sup>  | K1 | O2               | 119.7(19) |
| Na1 <sup>3</sup> | O1  | Na1 <sup>2</sup> | 180(3)     | O3 <sup>8</sup>  | K1 | O2 <sup>10</sup> | 60.2(12)  |
| Na1 <sup>3</sup> | O1  | Na1 <sup>7</sup> | 91(3)      | O3               | K1 | O2 <sup>6</sup>  | 119.7(19) |
| Nb1 <sup>8</sup> | O2  | Nb1              | 180.0      | O3 <sup>8</sup>  | K1 | O2               | 60.2(12)  |
| Nb1 <sup>8</sup> | O2  | K1 <sup>1</sup>  | 89.8(17)   | O3               | K1 | O2 <sup>12</sup> | 119.7(19) |
| Nb1 <sup>8</sup> | O2  | K1               | 89.8(17)   | O3 <sup>13</sup> | K1 | O2 <sup>12</sup> | 60.2(12)  |
| Nb1 <sup>8</sup> | O2  | K1 <sup>2</sup>  | 89.8(17)   | O3 <sup>8</sup>  | K1 | O2 <sup>6</sup>  | 120.1(18) |
| Nb1              | O2  | K1               | 90.2(17)   | O3               | K1 | O2               | 60.0(12)  |
| Nb1              | O2  | K1 <sup>2</sup>  | 90.2(17)   | O3 <sup>13</sup> | K1 | O2               | 120.1(19) |
| Nb1              | O2  | K1 <sup>9</sup>  | 90.2(17)   | O3 <sup>8</sup>  | K1 | O2 <sup>12</sup> | 120.1(18) |
| Nb1              | O2  | K1 <sup>1</sup>  | 90.2(17)   | O3               | K1 | O2 <sup>10</sup> | 60.0(12)  |
| Nb1 <sup>8</sup> | O2  | K1 <sup>9</sup>  | 89.8(17)   | O3 <sup>13</sup> | K1 | O2 <sup>10</sup> | 120.1(19) |
| Nb1 <sup>8</sup> | O2  | Na1 <sup>9</sup> | 89.8(17)   | O3 <sup>6</sup>  | K1 | O2 <sup>6</sup>  | 60.0(12)  |
| Nb1 <sup>8</sup> | O2  | Na1 <sup>1</sup> | 89.8(17)   | O3 <sup>13</sup> | K1 | O3 <sup>8</sup>  | 90(3)     |
| Nb1              | O2  | Na1 <sup>9</sup> | 90.2(17)   | O3 <sup>6</sup>  | K1 | O3               | 90(3)     |



|                  |    |                  |          |                  |    |                 |            |
|------------------|----|------------------|----------|------------------|----|-----------------|------------|
| Nb1              | O2 | Na1 <sup>2</sup> | 90.2(17) | O3 <sup>13</sup> | K1 | O3 <sup>6</sup> | 89.955(14) |
| Nb1 <sup>8</sup> | O2 | Na1 <sup>2</sup> | 89.8(17) | O3 <sup>8</sup>  | K1 | O3              | 89.955(14) |
| Nb1              | O2 | Na1 <sup>1</sup> | 90.2(17) | O3 <sup>8</sup>  | K1 | O3 <sup>6</sup> | 180(3)     |
| K1               | O2 | K1 <sup>9</sup>  | 180(3)   | O3 <sup>13</sup> | K1 | O3              | 180(3)     |
| K1               | O2 | K1 <sup>2</sup>  | 90.40(3) |                  |    |                 |            |

---

<sup>1</sup>-1+X,+Y,+Z; <sup>2</sup>+X,+Y,1+Z; <sup>3</sup>+X,-1+Y,+Z; <sup>4</sup>-1+X,-1+Y,+Z; <sup>5</sup>-1+X,-1+Y,1+Z; <sup>6</sup>1+X,+Y,+Z; <sup>7</sup>+X,-1+Y,1+Z; <sup>8</sup>+X,1+Y,+Z; <sup>9</sup>-1+X,+Y,1+Z; <sup>10</sup>+X,+Y,-1+Z; <sup>11</sup>+X,1+Y,-1+Z; <sup>12</sup>1+X,+Y,-1+Z; <sup>13</sup>1+X,1+Y,+Z

**Table S12 Atomic Occupancy for KNBaCuN.**

| Atom | Occupancy | Atom | Occupancy |
|------|-----------|------|-----------|
| K1   | 0.5       | Na1  | 0.5       |
